# Supplementary material
Source: publisher figshare collection journal article supplement (https://frontiersin.figshare.com/ndownloader/files/14065721)
Supplement: Supplementary file 1 [file 14065721]

***Supplementary Material***

***Title: Soil bacterial community are associated with high potato production and minimal water use***

***Authors:*** *Thiago Gumiere, Silvio J. Gumiere, Jean-Pascal Matteau, Philippe Constant, Alain N. Rousseau*


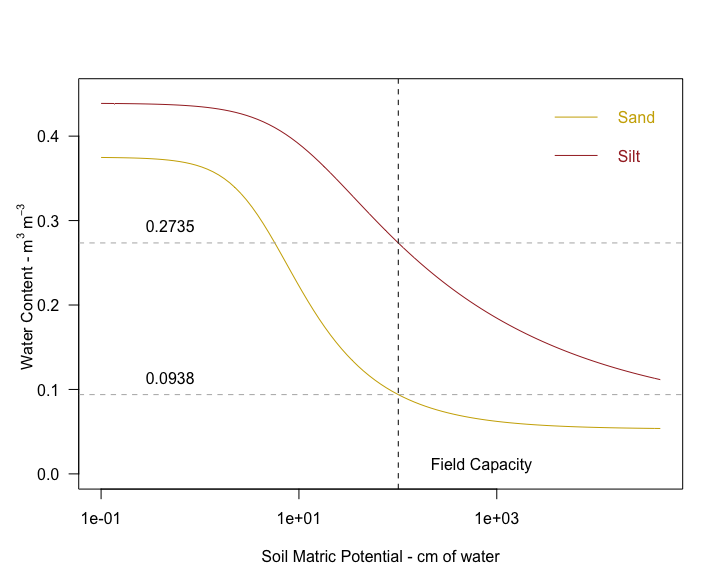


Figure S1 – Water retention curve relating the water content (m3 of water / m3 of soil), and soil water potential (cm of water). Considering |1 kPa | = 10.1972 cm of water


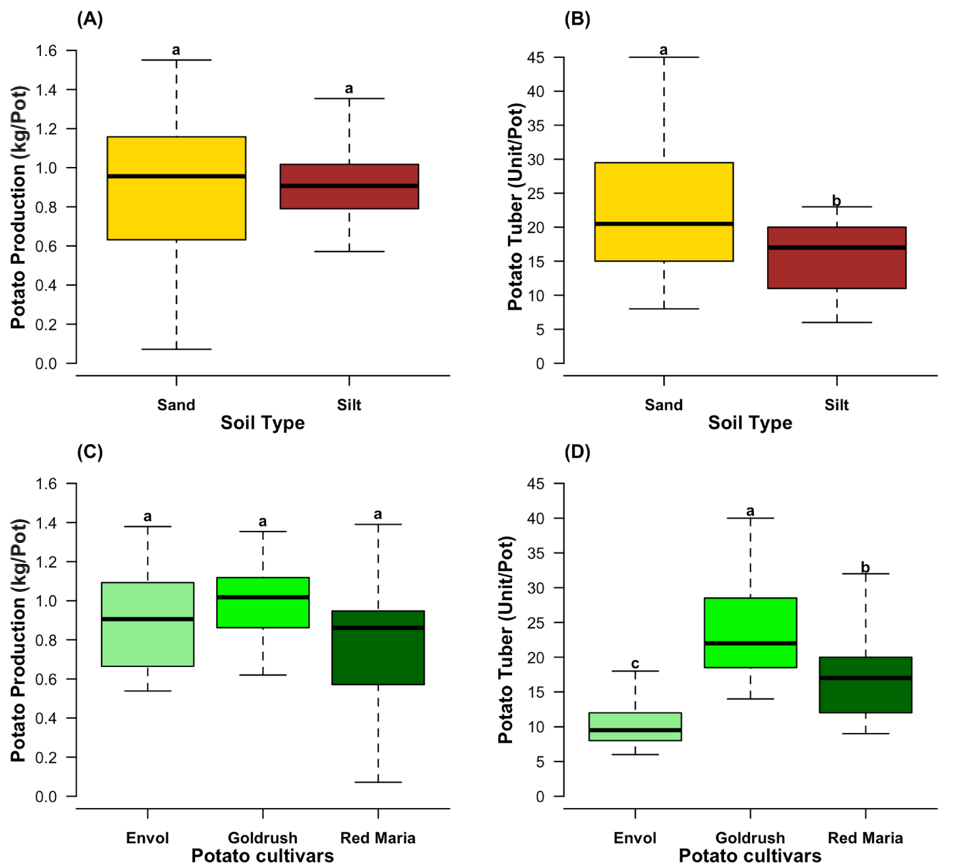


Figure S 2 – The boxplot of soil types and potato production (kg/pot) (A) and potato tuber number (unit/pot) (B). The boxplot of potato cultivar and potato production (kg/pot) (C) and potato tuber number (unit/pot) (D). The rank letters were obtained by ANOVA test (p-value<0.05) and Tukey test.


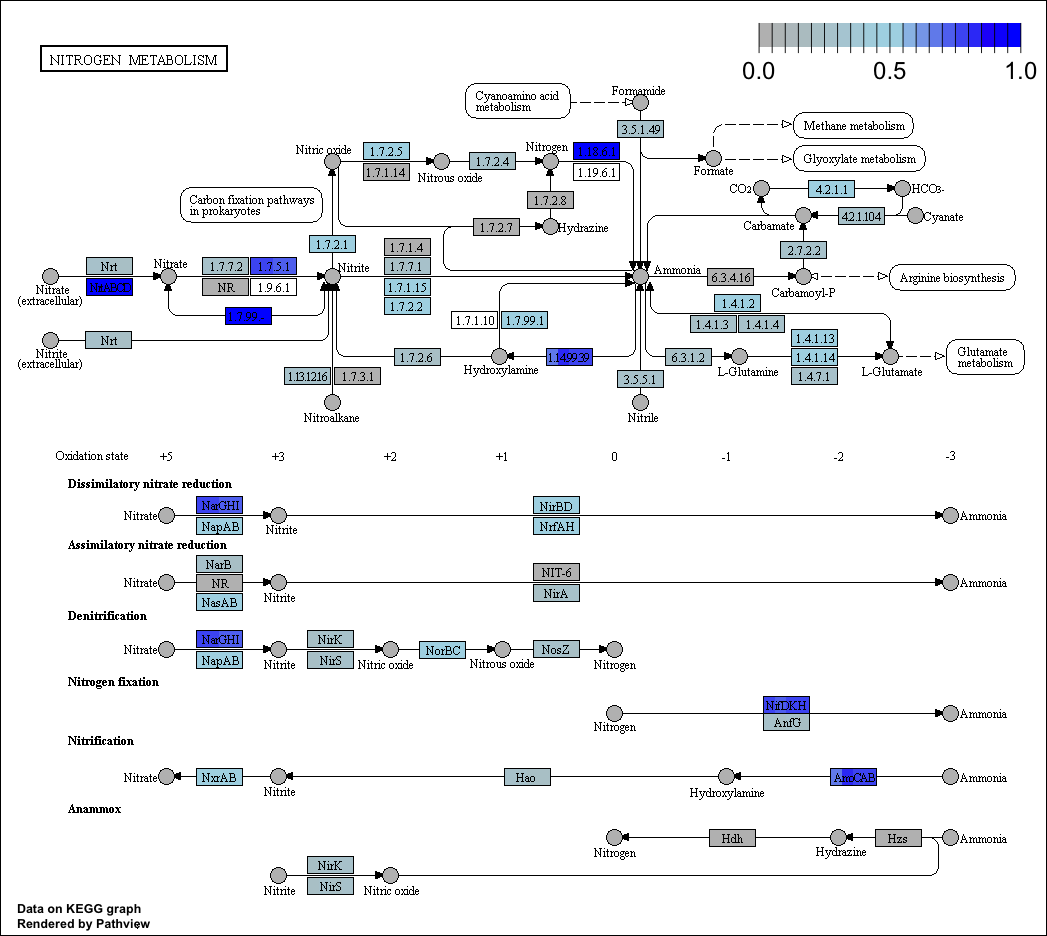


Figure S3 - Genes predicted in nitrogen metabolism (KEGG map 00910) based on taxonomic composition of soils cultivated with potato plants. Each square gene is divided in four parties related with different water irrigation treatments (-15 kPa, -25 kPa, -30 kPa, -45 kPa).


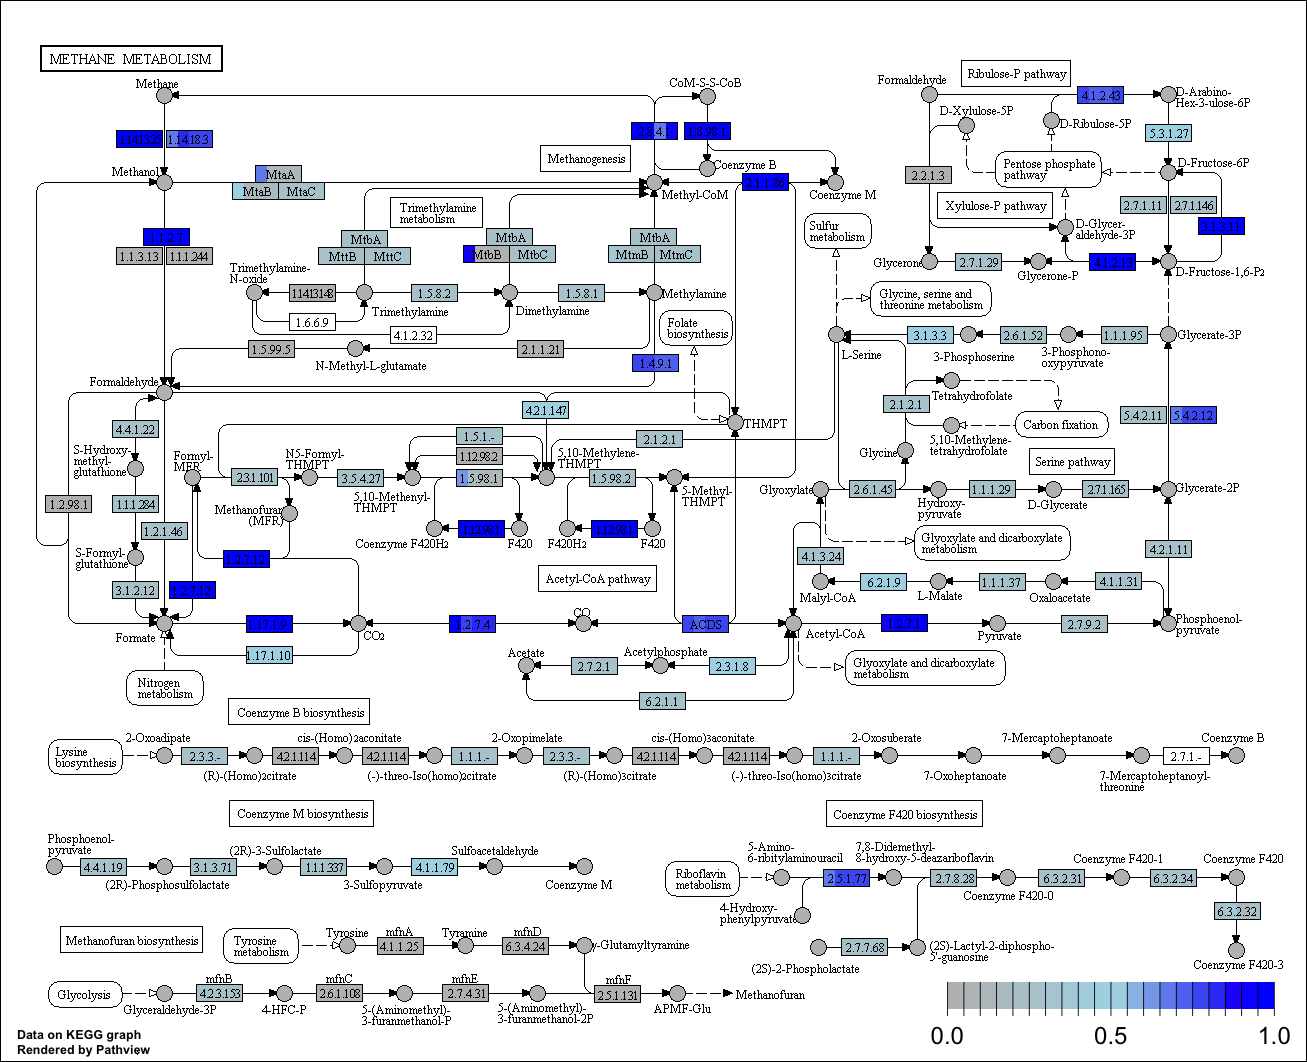


Figure S4 - Genes predicted in methane metabolism (KEGG map 00680) based on taxonomic composition of soils cultivated with potato plants. Each square gene is divided in four parties related with different water irrigation treatments (-15 kPa, -25 kPa, -30 kPa, -45 kPa).


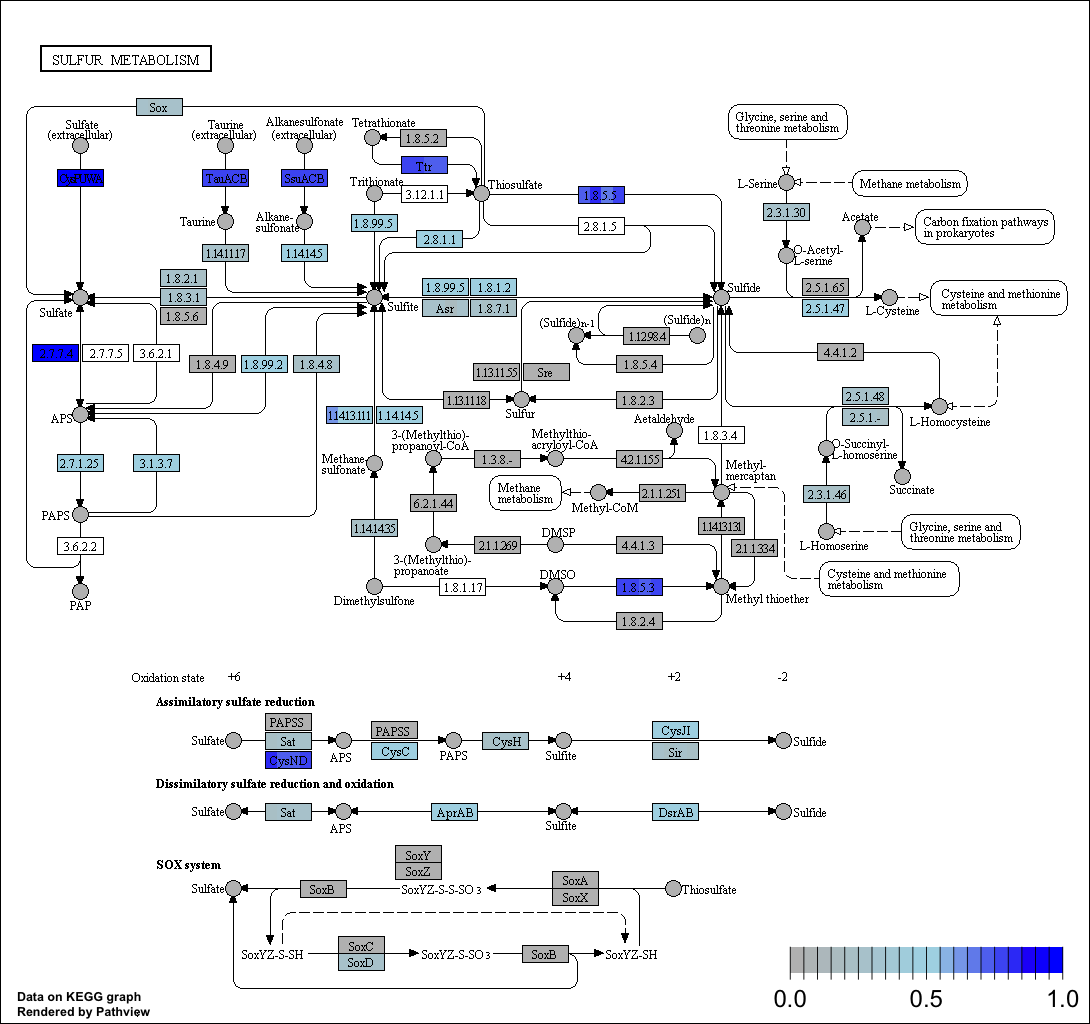


Figure S5 - Genes predicted in sulfur metabolism (KEGG map 00920) based on taxonomic composition of soils cultivated with potato plants. Each square gene is divided in four parties related with different water irrigation treatments (-15 kPa, -25 kPa, -30 kPa, -45 kPa)


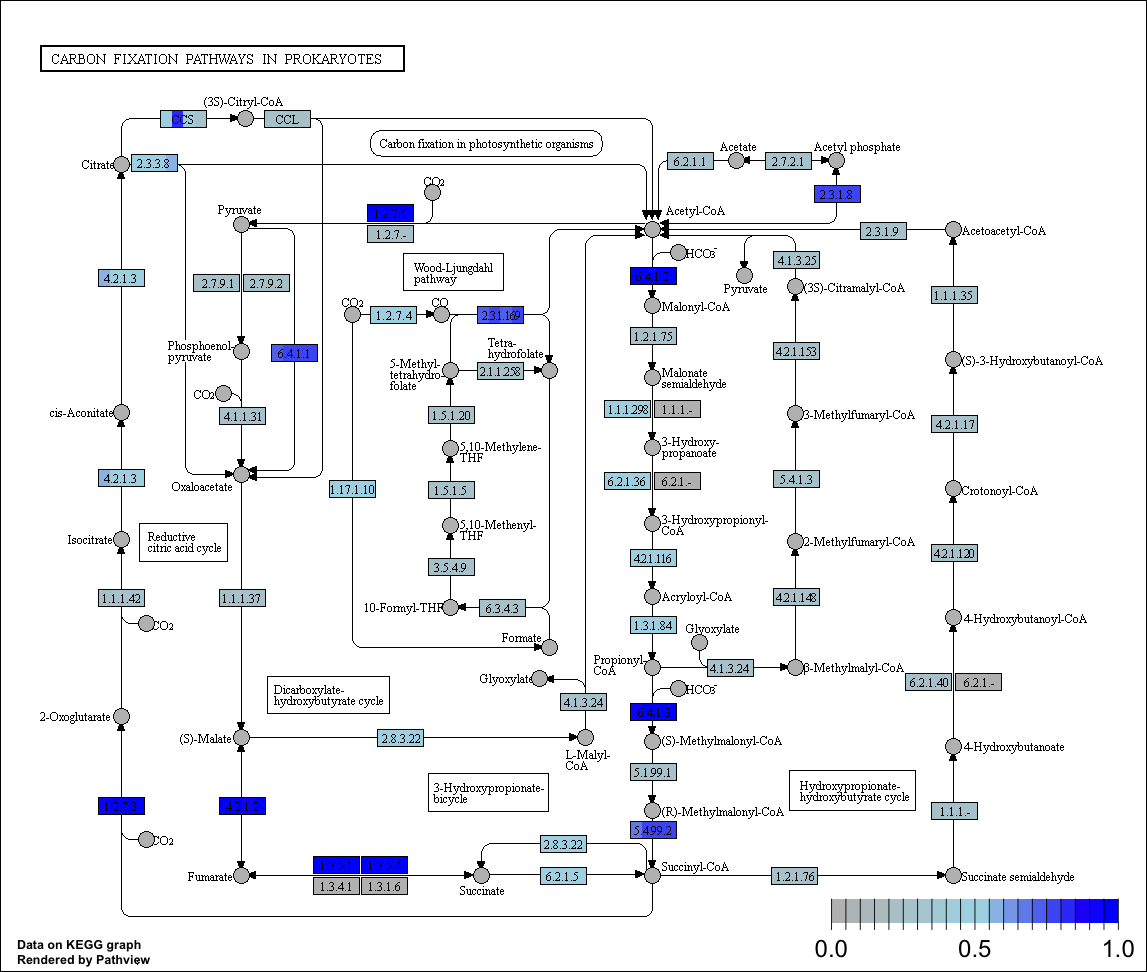


Figure S6 - Genes predicted in carbon fixation pathways in prokaryotes (KEGG map 00720) based on taxonomic composition of soils cultivated with potato plants. Each square gene is divided in four parties related with different water irrigation treatments (-15 kPa, -25 kPa, -30 kPa, -45 kPa).

Table S1 - Relative abundance of genera composition in soil samples for each irrigation level (not considering the unclassified sequences).

|  | Irrigation Levels | | | |
| --- | --- | --- | --- | --- |
| *Genera* | **-15 kPa** | **-25 kPa** | **-30 kPa** | **-45 kPa** |
| *Bacillus* | 3.54% | 5.00% | 5.16% | 5.87% |
| *Arthrobacter* | 5.67% | 4.91% | 3.76% | 3.80% |
| *Streptomyces* | 4.39% | 4.36% | 4.23% | 4.33% |
| *Bradyrhizobium* | 2.96% | 3.25% | 3.87% | 3.10% |
| *Variibacter* | 2.79% | 3.14% | 3.71% | 3.23% |
| *Sphingomonas* | 2.70% | 3.47% | 2.47% | 2.73% |
| *Clostridiumsensustricto13* | 2.01% | 2.81% | 2.89% | 3.58% |
| *Jatrophihabitans* | 2.79% | 2.56% | 2.44% | 2.14% |
| *Nocardioides* | 2.54% | 2.82% | 1.77% | 1.85% |
| *Uncultured actinobacterium* | 1.95% | 2.12% | 2.50% | 2.31% |
| *Rhodanobacter* | 3.86% | 1.80% | 0.84% | 0.84% |
| *Uncultured Verrucomicrobiabacterium* | 1.53% | 1.85% | 2.08% | 2.00% |
| *Pseudolabrys* | 1.62% | 1.80% | 2.09% | 1.86% |
| *Pseudonocardia* | 1.29% | 1.80% | 1.95% | 1.89% |
| *Blastococcus* | 1.41% | 1.89% | 1.60% | 1.62% |
| *Gemmatimonas* | 1.48% | 1.71% | 1.51% | 1.39% |
| *Bryobacter* | 1.21% | 1.50% | 1.72% | 1.53% |
| *Mycobacterium* | 1.30% | 1.29% | 1.77% | 1.33% |
| *Patulibacter* | 1.18% | 1.40% | 1.47% | 1.49% |
| *CandidatusSolibacter* | 1.00% | 1.25% | 1.69% | 1.45% |
| *Acidibacter* | 1.22% | 1.23% | 1.41% | 1.22% |
| *Blastocatella* | 0.98% | 1.28% | 1.28% | 1.38% |
| *Mizugakiibacter* | 2.02% | 0.77% | 0.69% | 1.27% |
| *Burkholderia* | 1.19% | 1.02% | 1.15% | 1.06% |
| *Roseiflexus* | 0.83% | 0.97% | 1.25% | 1.28% |
| *Gemmata* | 0.82% | 0.92% | 1.16% | 1.07% |
| *Massilia* | 0.64% | 1.67% | 0.59% | 0.98% |
| *Uncultured Actinomycetalesbacterium* | 0.71% | 0.84% | 1.29% | 0.87% |
| *Paenibacillus* | 0.71% | 0.92% | 0.91% | 1.12% |
| *Solirubrobacter* | 0.81% | 0.89% | 0.87% | 0.91% |
| *Pir4lineage* | 0.75% | 0.78% | 0.83% | 0.82% |
| *Sporosarcina* | 0.55% | 0.77% | 0.81% | 0.92% |
| *Planctomyces* | 0.63% | 0.66% | 0.91% | 0.84% |
| *Conexibacter* | 0.78% | 0.69% | 0.59% | 0.65% |
| *Marmoricola* | 0.60% | 0.64% | 0.75% | 0.74% |
| *Haliangium* | 0.42% | 0.71% | 0.80% | 0.81% |
| *Oryzihumus* | 0.67% | 0.73% | 0.67% | 0.63% |
| *Uncultured Conexibactersp.* | 0.55% | 0.74% | 0.76% | 0.65% |
| *Devosia* | 0.87% | 0.60% | 0.62% | 0.57% |
| *Bauldia* | 0.59% | 0.63% | 0.72% | 0.70% |
| *Terrabacter* | 0.69% | 0.77% | 0.58% | 0.57% |
| *Uncultured Gaiellasp.* | 0.45% | 0.60% | 0.69% | 0.63% |
| *Isosphaera* | 0.54% | 0.59% | 0.68% | 0.51% |
| *Nakamurella* | 0.55% | 0.55% | 0.62% | 0.56% |
| *Phenylobacterium* | 0.48% | 0.55% | 0.61% | 0.64% |
| *Rhizomicrobium* | 0.55% | 0.53% | 0.63% | 0.54% |
| *Uncultured Prosthecobactersp.* | 0.47% | 0.54% | 0.63% | 0.59% |
| *Singulisphaera* | 0.41% | 0.56% | 0.61% | 0.54% |
| *Uncultured Rubrobacteraceaebacterium* | 0.45% | 0.44% | 0.52% | 0.67% |
| *Methylobacterium* | 0.33% | 0.54% | 0.50% | 0.66% |
| *Rhodoplanes* | 0.42% | 0.46% | 0.61% | 0.50% |
| *Reyranella* | 0.40% | 0.44% | 0.52% | 0.53% |
| *Chthonomonas* | 0.32% | 0.42% | 0.56% | 0.58% |
| *Phycicoccus* | 0.47% | 0.59% | 0.41% | 0.39% |
| *Pirellula* | 0.37% | 0.40% | 0.48% | 0.52% |
| *Angustibacter* | 0.43% | 0.47% | 0.42% | 0.42% |
| *Gaiella* | 0.35% | 0.38% | 0.48% | 0.47% |
| *Nitrospira* | 1.07% | 0.13% | 0.16% | 0.16% |
| *Dokdonella* | 0.44% | 0.38% | 0.40% | 0.35% |
| *Rhizobium* | 0.34% | 0.35% | 0.42% | 0.47% |
| *Ramlibacter* | 0.33% | 0.30% | 0.45% | 0.48% |
| *Opitutus* | 0.33% | 0.50% | 0.35% | 0.37% |
| *Mesorhizobium* | 0.52% | 0.32% | 0.32% | 0.32% |
| *Uncultured proteobacterium* | 0.32% | 0.39% | 0.40% | 0.36% |
| *Uncultured soilbacterium* | 1.34% | >0.01% | >0.01% | >0.01% |
| *bacteriumEllin6517* | 0.27% | 0.35% | 0.42% | 0.40% |
| *Sphingobacterium* | 0.30% | 0.34% | 0.46% | 0.34% |
| *Lysinibacillus* | 0.25% | 0.35% | 0.37% | 0.38% |
| *Chthoniobacter* | 0.37% | 0.26% | 0.33% | 0.34% |
| *Lapillicoccus* | 0.32% | 0.36% | 0.28% | 0.29% |
| *Pullulanibacillus* | 0.32% | 0.58% | 0.14% | 0.17% |
| *CL500-29marinegroup* | 0.24% | 0.25% | 0.34% | 0.36% |
| *Rhodopseudomonas* | 0.30% | 0.30% | 0.33% | 0.26% |
| *Tumebacillus* | 0.25% | 0.30% | 0.26% | 0.36% |
| *Crossiella* | 0.24% | 0.32% | 0.31% | 0.28% |
| *Acidothermus* | 0.25% | 0.29% | 0.35% | 0.27% |
| *Naasia* | 0.49% | 0.24% | 0.19% | 0.21% |
| *Lysinimonas* | 0.66% | 0.15% | 0.13% | 0.13% |
| *Uncultured Mycobacteriumsp.* | 0.21% | 0.25% | 0.34% | 0.26% |
| *Martelella* | 0.37% | 0.33% | 0.13% | 0.20% |
| *Xanthomonas* | 0.26% | 0.44% | 0.12% | 0.18% |
| *Desulfosporosinus* | 0.18% | 0.25% | 0.26% | 0.32% |
| *Sorangium* | 0.21% | 0.27% | 0.26% | 0.26% |
| *Flexivirga* | 0.83% | 0.04% | 0.03% | 0.03% |
| *Modestobacter* | 0.19% | 0.23% | 0.25% | 0.26% |
| *Uncultured alphaproteobacterium* | 0.18% | 0.20% | 0.29% | 0.25% |
| *Hyphomicrobium* | 0.22% | 0.23% | 0.23% | 0.21% |
| *Pseudoclavibacter* | 0.51% | 0.14% | 0.09% | 0.12% |
| *Uncultured forestsoilbacterium* | 0.18% | 0.21% | 0.25% | 0.22% |
| *Pedomicrobium* | 0.17% | 0.20% | 0.23% | 0.24% |
| *Acidovorax* | 0.24% | 0.19% | 0.18% | 0.22% |
| *Arenimonas* | 0.20% | 0.20% | 0.21% | 0.20% |
| *Noviherbaspirillum* | 0.15% | 0.22% | 0.22% | 0.23% |
| *Kitasatospora* | 0.19% | 0.20% | 0.20% | 0.19% |
| *Alsobacter* | 0.14% | 0.21% | 0.21% | 0.22% |
| *Methylorosula* | 0.16% | 0.21% | 0.18% | 0.22% |
| *Leifsonia* | 0.41% | 0.13% | 0.11% | 0.09% |
| *CandidatusXiphinematobacter* | 0.16% | 0.19% | 0.20% | 0.20% |
| *Uncultured Sphingomonadaceaebacterium* | 0.15% | 0.20% | 0.22% | 0.19% |
| *Sporichthya* | 0.17% | 0.19% | 0.19% | 0.20% |
| *Labrys* | 0.15% | 0.19% | 0.20% | 0.22% |
| *Pedobacter* | 0.49% | 0.08% | 0.03% | 0.10% |
| *Uncultured Hyphomicrobiaceaebacterium* | 0.16% | 0.19% | 0.18% | 0.19% |
| *Solibacillus* | 0.13% | 0.18% | 0.19% | 0.22% |
| *Sporolactobacillus* | 0.13% | 0.19% | 0.19% | 0.20% |
| *Streptosporangium* | 0.13% | 0.27% | 0.11% | 0.18% |
| *Anaeromyxobacter* | 0.60% | >0.01% | 0.01% | 0.01% |
| *Afipia* | 0.14% | 0.18% | 0.18% | 0.18% |
| *Brevundimonas* | 0.17% | 0.15% | 0.18% | 0.15% |
| *Frigoribacterium* | 0.42% | 0.06% | 0.07% | 0.08% |
| *Micromonospora* | 0.11% | 0.16% | 0.19% | 0.20% |
| *Actinoplanes* | 0.32% | 0.13% | 0.06% | 0.11% |
| *Lysobacter* | 0.14% | 0.16% | 0.18% | 0.17% |
| *Microvirga* | 0.12% | 0.16% | 0.16% | 0.19% |
| *Uncultured Pseudonocardiaceaebacterium* | 0.12% | 0.21% | 0.15% | 0.15% |
| *Telmatobacter* | 0.11% | 0.15% | 0.21% | 0.12% |
| *Actinoallomurus* | 0.10% | 0.15% | 0.17% | 0.16% |
| *Actinomycetospora* | 0.12% | 0.15% | 0.15% | 0.15% |
| *Planococcus* | 0.13% | 0.14% | 0.14% | 0.12% |
| *Catenulispora* | 0.09% | 0.13% | 0.15% | 0.17% |
| *Aeromicrobium* | 0.20% | 0.12% | 0.09% | 0.10% |
| *Variovorax* | 0.11% | 0.11% | 0.15% | 0.14% |
| *Iamia* | 0.11% | 0.13% | 0.15% | 0.11% |
| *Actinospica* | 0.11% | 0.13% | 0.12% | 0.15% |
| *Nonomuraea* | 0.10% | 0.12% | 0.16% | 0.13% |
| *Uncultured Cystobacterineaebacterium* | 0.14% | 0.13% | 0.11% | 0.12% |
| *Azospira* | 0.11% | 0.12% | 0.14% | 0.13% |
| *Flavisolibacter* | 0.11% | 0.16% | 0.10% | 0.12% |
| *Pseudomonas* | 0.10% | 0.11% | 0.06% | 0.22% |
| *Geodermatophilus* | 0.39% | 0.02% | 0.02% | 0.03% |
| *Microbacterium* | 0.13% | 0.11% | 0.11% | 0.13% |
| *Cohnella* | 0.09% | 0.11% | 0.12% | 0.14% |
| *Microlunatus* | 0.10% | 0.11% | 0.11% | 0.11% |
| *Uncultured betaproteobacterium* | 0.08% | 0.10% | 0.13% | 0.11% |
| *Kribbella* | 0.12% | 0.13% | 0.10% | 0.06% |
| *Aquicella* | 0.11% | 0.10% | 0.10% | 0.10% |
| *Virgibacillus* | 0.08% | 0.11% | 0.09% | 0.14% |
| *Uncultured Acidobacteriabacterium* | 0.09% | 0.09% | 0.11% | 0.13% |
| *ConexibacterwoeseiIso977N* | 0.09% | 0.10% | 0.12% | 0.10% |
| *Ensifer* | 0.27% | 0.03% | >0.01% | 0.08% |
| *Chryseobacterium* | 0.24% | 0.05% | 0.03% | 0.06% |
| *Uncultured Conexibacteraceaebacterium* | 0.07% | 0.09% | 0.13% | 0.11% |
| *Terrimonas* | 0.08% | 0.08% | 0.10% | 0.12% |
| *Uncultured Mycobacteriaceaebacterium* | 0.09% | 0.09% | 0.09% | 0.11% |
| *Amycolatopsis* | 0.09% | 0.11% | 0.11% | 0.07% |
| *Uncultured Bradyrhizobiaceaebacterium* | 0.07% | 0.08% | 0.12% | 0.10% |
| *Uncultured Rubrobacteralesbacterium* | 0.10% | 0.10% | 0.09% | 0.08% |
| *Granulicella* | 0.08% | 0.09% | 0.12% | 0.09% |
| *Catellatospora* | 0.07% | 0.10% | 0.11% | 0.09% |
| *Woodsholea* | 0.08% | 0.07% | 0.10% | 0.10% |
| *Uncultured Rubrobacteridaebacterium* | 0.06% | 0.09% | 0.10% | 0.10% |
| *Nordella* | 0.08% | 0.09% | 0.09% | 0.10% |
| *Ferruginibacter* | 0.08% | 0.08% | 0.09% | 0.10% |
| *CandidatusKoribacter* | 0.07% | 0.08% | 0.11% | 0.08% |
| *Rhodococcus* | 0.07% | 0.08% | 0.07% | 0.12% |
| *Luedemannella* | 0.07% | 0.06% | 0.09% | 0.10% |
| *Flavobacterium* | 0.02% | 0.07% | 0.01% | 0.23% |
| *Actinosynnema* | 0.22% | 0.02% | 0.02% | 0.03% |
| *Bosea* | 0.10% | 0.08% | 0.10% | 0.04% |
| *Skermanella* | 0.07% | 0.07% | 0.08% | 0.08% |
| *Paucimonas* | 0.07% | 0.08% | 0.07% | 0.08% |
| *Spirilliplanes* | 0.05% | 0.06% | 0.09% | 0.10% |
| *Acidiphilium* | 0.06% | 0.09% | 0.08% | 0.08% |
| *Actinomadura* | 0.07% | 0.07% | 0.08% | 0.07% |
| *Uncultured Planctomycetaceaebacterium* | 0.12% | 0.04% | 0.04% | 0.07% |
| *Roseateles* | 0.05% | 0.08% | 0.09% | 0.07% |
| *Frankia* | 0.06% | 0.06% | 0.09% | 0.06% |
| *Couchioplanes* | 0.05% | 0.08% | 0.07% | 0.07% |
| *Dactylosporangium* | 0.06% | 0.07% | 0.06% | 0.08% |
| *Clostridiumsensustricto9* | 0.04% | 0.06% | 0.07% | 0.08% |
| *Altererythrobacter* | 0.07% | 0.07% | 0.06% | 0.06% |
| *Mucilaginibacter* | 0.07% | 0.06% | 0.06% | 0.06% |
| *Nitratireductor* | 0.08% | 0.05% | 0.05% | 0.05% |
| *Uncultured eubacteriumWD248* | 0.10% | 0.04% | 0.05% | 0.04% |
| *Cellulomonas* | 0.05% | 0.06% | 0.08% | 0.05% |
| *Rhizobacter* | 0.06% | 0.05% | 0.05% | 0.06% |
| *Uncultured Methylocystaceaebacterium* | 0.05% | 0.06% | 0.05% | 0.06% |
| *Nitrolancea* | 0.05% | 0.05% | 0.06% | 0.06% |
| *Novosphingobium* | 0.05% | 0.04% | 0.05% | 0.06% |
| *Oceanobacillus* | 0.04% | 0.05% | 0.05% | 0.07% |
| *Umezawaea* | 0.04% | 0.04% | 0.07% | 0.05% |
| *Janthinobacterium* | 0.04% | 0.05% | 0.09% | 0.02% |
| *Lentzea* | 0.02% | 0.08% | 0.01% | 0.09% |
| *Polaromonas* | 0.07% | 0.03% | 0.04% | 0.05% |
| *Achromobacter* | 0.05% | 0.04% | 0.05% | 0.05% |
| *Segetibacter* | 0.02% | 0.06% | 0.04% | 0.06% |
| *Sphaerisporangiumviridialbum* | 0.03% | 0.04% | 0.05% | 0.05% |
| *Uncultured Acidimicrobidaebacterium* | 0.08% | 0.03% | 0.03% | 0.04% |
| *Motilibacter* | 0.14% | 0.01% | >0.01% | 0.02% |
| *Methylovirgula* | 0.16% | 0.01% | >0.01% | >0.01% |
| *Friedmanniella* | 0.03% | 0.04% | 0.05% | 0.06% |
| *Comamonas* | 0.03% | 0.04% | 0.05% | 0.05% |
| *Serratia* | 0.03% | 0.05% | 0.04% | 0.06% |
| *Phaselicystis* | 0.04% | 0.04% | 0.04% | 0.05% |
| *Acidobacterium* | 0.05% | 0.04% | 0.04% | 0.04% |
| *Uncultured Ktedonobactersp.* | 0.03% | 0.04% | 0.04% | 0.05% |
| *Pelosinus* | 0.03% | 0.04% | 0.04% | 0.05% |
| *Nitrosospira* | 0.03% | 0.03% | 0.05% | 0.05% |
| *Paucisalibacillus* | 0.04% | 0.03% | 0.04% | 0.05% |
| *freshwatersedimentmetagenome* | 0.03% | 0.04% | 0.04% | 0.05% |
| *Uncultured deltaproteobacterium* | 0.03% | 0.04% | 0.04% | 0.04% |
| *Uncultured Chloroflexibacterium* | 0.03% | 0.04% | 0.04% | 0.04% |
| *Caulobacter* | 0.05% | 0.03% | 0.02% | 0.05% |
| *Kineosporia* | 0.03% | 0.03% | 0.04% | 0.05% |
| *Uncultured organism* | 0.03% | 0.04% | 0.04% | 0.04% |
| *Ktedonobacter* | 0.03% | 0.04% | 0.03% | 0.05% |
| *Blastochloris* | 0.03% | 0.04% | 0.04% | 0.04% |
| *Legionella* | 0.04% | 0.04% | 0.04% | 0.03% |
| *Microcoleus* | 0.01% | 0.04% | 0.05% | 0.05% |
| *Alicyclobacillus* | 0.03% | 0.04% | 0.03% | 0.04% |
| *Byssovorax* | 0.09% | 0.02% | 0.01% | 0.01% |
| *Uncultured Spartobacteriabacterium* | 0.03% | 0.03% | 0.03% | 0.04% |
| *Rudaibacter* | 0.03% | 0.03% | 0.04% | 0.03% |
| *Bdellovibrio* | 0.12% | >0.01% | >0.01% | >0.01% |
| *Defluviicoccus* | 0.03% | 0.03% | 0.03% | 0.04% |
| *Parafilimonas* | 0.03% | 0.03% | 0.04% | 0.04% |
| *Herbiconiux* | 0.08% | 0.02% | 0.02% | 0.02% |
| *Stenotrophomonas* | 0.04% | 0.03% | 0.03% | 0.04% |
| *Cupriavidus* | 0.07% | 0.01% | 0.01% | 0.03% |
| *Dongia* | 0.04% | 0.03% | 0.04% | 0.03% |
| *Uncultured Rhizobialesbacterium* | 0.03% | 0.02% | 0.04% | 0.04% |
| *Methylocystis* | 0.03% | 0.02% | 0.04% | 0.04% |
| *CandidatusMicrothrix* | 0.02% | 0.03% | 0.04% | 0.04% |
| *Hirschia* | 0.04% | 0.03% | 0.03% | 0.03% |
| *Chitinimonas* | >0.01% | 0.04% | >0.01% | 0.08% |
| *Niastella* | 0.03% | 0.04% | 0.03% | 0.03% |
| *Lachnoclostridium* | 0.03% | 0.03% | 0.03% | 0.03% |
| *Pandoraea* | 0.04% | 0.03% | 0.02% | 0.02% |
| *Luteimonas* | 0.03% | 0.04% | 0.02% | 0.03% |
| *Nocardia* | 0.03% | 0.03% | 0.04% | 0.03% |
| *Microbispora* | 0.08% | 0.01% | >0.01% | 0.02% |
| *Planosporangium* | 0.02% | 0.03% | 0.04% | 0.03% |
| *Taibaiella* | 0.02% | 0.03% | 0.04% | 0.03% |
| *Vasilyevaea* | 0.04% | 0.03% | 0.02% | 0.03% |
| *Psychrobacillus* | 0.03% | 0.03% | 0.03% | 0.03% |
| *CandidatusAlysiosphaera* | 0.02% | 0.03% | 0.03% | 0.04% |
| *Acidicaldus* | 0.03% | 0.03% | 0.03% | 0.02% |
| *Nostoc* | 0.02% | 0.02% | 0.04% | 0.03% |
| *Schlesneria* | 0.02% | 0.02% | 0.03% | 0.03% |
| *Clostridiumsensustricto1* | 0.02% | 0.03% | 0.03% | 0.03% |
| *Domibacillus* | 0.02% | 0.03% | 0.03% | 0.03% |
| *Uncultured Thermosporotrichaceaebacterium* | 0.02% | 0.03% | 0.03% | 0.03% |
| *Sphingopyxis* | 0.06% | 0.01% | 0.01% | 0.01% |
| *Uncultured Polyangiaceaebacterium* | 0.02% | 0.03% | 0.02% | 0.03% |
| *Uncultured Cystobacteraceaebacterium* | 0.02% | 0.02% | 0.03% | 0.03% |
| *Deinococcus* | 0.02% | 0.03% | 0.03% | 0.03% |
| *Pedosphaera* | 0.02% | 0.02% | 0.03% | 0.03% |
| *Uncultured Microbacteriaceaebacterium* | 0.02% | 0.02% | 0.03% | 0.02% |
| *Frateuria* | 0.02% | 0.02% | 0.01% | 0.04% |
| *GAL15* | 0.02% | 0.03% | 0.02% | 0.03% |
| *Uncultured Acetobacteraceaebacterium* | 0.02% | 0.02% | 0.03% | 0.02% |
| *Tahibacter* | 0.02% | 0.02% | 0.03% | 0.03% |
| *Vulgatibacter* | 0.02% | 0.02% | 0.02% | 0.02% |
| *Inquilinus* | 0.02% | 0.02% | 0.02% | 0.02% |
| *Sphingobium* | 0.02% | 0.03% | 0.02% | 0.02% |
| *Georgenia* | 0.03% | 0.02% | 0.02% | 0.02% |
| *Aquabacterium* | 0.02% | 0.02% | 0.02% | 0.03% |
| *Methylotenera* | 0.02% | 0.02% | 0.03% | 0.01% |
| *Phyllobacterium* | 0.03% | 0.01% | 0.02% | 0.01% |
| *Polycyclovorans* | 0.02% | 0.02% | 0.02% | 0.02% |
| *Uncultured Aciditerrimonassp.* | 0.01% | 0.02% | 0.03% | 0.02% |
| *Luteolibacter* | 0.02% | 0.02% | 0.02% | 0.02% |
| *Flavitalea* | 0.01% | 0.01% | 0.02% | 0.03% |
| *CandidatusNostocoida* | 0.02% | 0.02% | 0.02% | 0.02% |
| *Lachnoclostridium5* | 0.01% | 0.02% | 0.02% | 0.02% |
| *Kutzneria* | 0.02% | 0.02% | 0.02% | 0.01% |
| *Rhodopila* | 0.01% | 0.02% | 0.02% | 0.02% |
| *Tuberibacillus* | 0.02% | 0.03% | 0.02% | 0.01% |
| *Herminiimonas* | 0.02% | 0.02% | 0.02% | 0.02% |
| *Elstera* | 0.01% | 0.02% | 0.02% | 0.02% |
| *Chryseolinea* | 0.03% | 0.01% | 0.02% | 0.01% |
| *Holophaga* | 0.02% | 0.01% | 0.02% | 0.02% |
| *Corallococcus* | 0.01% | 0.01% | 0.02% | 0.02% |
| *Dyella* | 0.02% | 0.03% | 0.01% | 0.02% |
| *Turicibacter* | 0.01% | 0.02% | 0.02% | 0.02% |
| *CandidatusSaccharimonas* | 0.03% | 0.03% | >0.01% | >0.01% |
| *Uncultured Bacteroidetesbacterium* | 0.03% | 0.01% | 0.01% | 0.02% |
| *Pelomonas* | 0.01% | 0.02% | 0.02% | 0.02% |
| *Edaphobacter* | 0.02% | 0.02% | 0.01% | 0.01% |
| *Shinella* | 0.04% | 0.01% | 0.01% | 0.01% |
| *Steroidobacter* | 0.02% | 0.01% | 0.02% | 0.01% |
| *SM1A02* | 0.02% | 0.01% | 0.02% | 0.02% |
| *Longispora* | 0.02% | 0.01% | 0.02% | 0.01% |
| *Anaerosinus* | 0.01% | 0.01% | 0.01% | 0.02% |
| *AKYG587* | 0.01% | 0.01% | 0.02% | 0.02% |
| *Smaragdicoccus* | 0.01% | 0.02% | 0.02% | 0.01% |
| *Uncultured typeIImethanotroph* | 0.01% | 0.01% | 0.02% | 0.02% |
| *Clostridiumsensustricto12* | 0.04% | 0.01% | >0.01% | 0.01% |
| *Peredibacter* | 0.01% | 0.01% | 0.01% | 0.02% |
| *Aureimonas* | 0.01% | 0.02% | 0.01% | 0.02% |
| *Nostocsp.PCC7107* | 0.02% | 0.01% | 0.01% | 0.02% |
| *Rhodovastum* | 0.02% | 0.01% | 0.01% | 0.01% |
| *Ornithinibacillus* | 0.01% | 0.01% | 0.01% | 0.02% |
| *Duganella* | 0.01% | 0.01% | 0.02% | 0.01% |
| *Leptospirillum* | 0.01% | 0.01% | 0.02% | 0.02% |
| *Leptolyngbya* | 0.01% | 0.01% | 0.04% | 0.01% |
| *possiblegenus04* | 0.05% | >0.01% | >0.01% | >0.01% |
| *Porphyrobacter* | 0.01% | 0.01% | 0.01% | 0.02% |
| *Enterobacter* | 0.02% | 0.02% | 0.01% | 0.01% |
| *Sandaracinus* | 0.01% | 0.01% | 0.01% | 0.01% |
| *Chlorochromatium* | 0.01% | 0.01% | 0.01% | 0.02% |
| *Hymenobacter* | 0.01% | 0.02% | 0.01% | 0.02% |
| *Demetria* | 0.04% | >0.01% | >0.01% | >0.01% |
| *Delftia* | 0.02% | 0.01% | 0.01% | 0.01% |
| *Rhodomicrobium* | 0.01% | 0.01% | 0.01% | 0.01% |
| *Haloactinobacterium* | 0.03% | 0.01% | >0.01% | 0.01% |
| *Intestinibacter* | 0.04% | >0.01% | >0.01% | >0.01% |
| *Chitinophaga* | 0.01% | 0.01% | 0.02% | 0.01% |
| *Parapusillimonas* | 0.01% | 0.01% | 0.01% | 0.01% |
| *Ruminiclostridium1* | 0.04% | >0.01% | >0.01% | >0.01% |
| *Amaricoccus* | 0.01% | 0.01% | 0.01% | 0.01% |
| *Acinetobacter* | 0.01% | 0.01% | 0.01% | 0.01% |
| *OM27clade* | 0.01% | 0.01% | 0.01% | 0.01% |
| *Actinotalea* | 0.01% | 0.01% | 0.01% | 0.01% |
| *Rhodoglobus* | 0.03% | >0.01% | >0.01% | >0.01% |
| *Uncultured Ktedobacteriabacterium* | 0.01% | 0.01% | 0.01% | 0.01% |
| *bacteriumenrichmentculturecloneauto73_4W* | 0.01% | 0.01% | 0.01% | 0.01% |
| *Limnobacter* | 0.01% | 0.01% | 0.01% | 0.01% |
| *Undibacterium* | 0.01% | 0.01% | 0.01% | 0.01% |
| *Mobilitalea* | 0.01% | 0.01% | 0.01% | 0.01% |
| *Actinocorallia* | >0.01% | 0.01% | 0.01% | 0.01% |
| *Nevskia* | 0.01% | 0.01% | 0.01% | 0.01% |
| *Lentibacillus* | 0.01% | 0.01% | 0.01% | 0.01% |
| *Geobacter* | 0.01% | 0.01% | 0.01% | 0.01% |
| *Shimazuella* | 0.01% | 0.01% | 0.01% | 0.01% |
| *Uncultured Rhodospirillaceaebacterium* | 0.03% | >0.01% | >0.01% | >0.01% |
| *Agromyces* | 0.01% | 0.01% | 0.01% | 0.01% |
| *Propionicicella* | >0.01% | 0.01% | 0.01% | 0.01% |
| *Castellaniella* | 0.01% | >0.01% | 0.01% | 0.01% |
| *Adhaeribacter* | 0.03% | >0.01% | >0.01% | >0.01% |
| *Elizabethkingia* | 0.01% | 0.01% | >0.01% | 0.01% |
| *Sporomusa* | 0.01% | 0.01% | 0.01% | 0.01% |
| *Herbidospora* | >0.01% | 0.01% | 0.01% | 0.01% |
| *OM43clade* | 0.01% | 0.01% | 0.01% | 0.01% |
| *Falsibacillus* | 0.02% | >0.01% | >0.01% | 0.01% |
| *Clavibacter* | 0.01% | 0.01% | 0.01% | 0.01% |
| *CandidatusMethylacidiphilum* | 0.01% | 0.01% | 0.01% | 0.01% |
| *Thermobacillus* | >0.01% | 0.01% | 0.01% | 0.01% |
| *Cellvibrio* | 0.01% | 0.01% | 0.01% | 0.01% |
| *Virgisporangium* | 0.01% | 0.01% | 0.01% | 0.01% |
| *Planomicrobium* | >0.01% | 0.01% | 0.01% | 0.01% |
| *Roseomonas* | 0.01% | 0.01% | 0.01% | 0.01% |
| *Aminobacter* | 0.02% | >0.01% | >0.01% | >0.01% |
| *Methylocella* | 0.01% | 0.01% | 0.01% | 0.01% |
| *Cryobacterium* | 0.01% | 0.01% | 0.01% | 0.01% |
| *Pasteuria* | 0.02% | >0.01% | >0.01% | >0.01% |
| *Pusillimonas* | 0.02% | >0.01% | >0.01% | >0.01% |
| *Paralcaligenes* | >0.01% | >0.01% | 0.01% | 0.01% |
| *Chungangia* | 0.01% | >0.01% | 0.01% | 0.01% |
| *Phreatobacter* | >0.01% | >0.01% | 0.01% | 0.01% |
| *Fodinicola* | 0.01% | 0.01% | >0.01% | 0.01% |
| *Herbaspirillum* | >0.01% | 0.01% | 0.01% | 0.01% |
| *Sphaerotilus* | 0.01% | >0.01% | >0.01% | 0.01% |
| *Asticcacaulis* | 0.01% | 0.01% | >0.01% | >0.01% |
| *Azospirillum* | 0.01% | >0.01% | 0.01% | 0.01% |
| *Uncultured Oscillatorialescyanobacterium* | 0.01% | >0.01% | 0.01% | >0.01% |
| *CandidatusProtochlamydia* | >0.01% | 0.01% | 0.01% | 0.01% |
| *Haloferula* | 0.01% | >0.01% | >0.01% | 0.01% |
| *Leptothrix* | 0.01% | >0.01% | 0.01% | >0.01% |
| *Fontibacillus* | >0.01% | 0.01% | >0.01% | 0.01% |
| *Bacteriovorax* | >0.01% | 0.01% | >0.01% | 0.01% |
| *CandidatusCaptivus* | >0.01% | >0.01% | 0.01% | 0.01% |
| *Clostridiumsensustricto3* | 0.01% | 0.01% | >0.01% | >0.01% |
| *Uncultured Firmicutesbacterium* | 0.01% | >0.01% | >0.01% | >0.01% |
| *Luteibacter* | >0.01% | >0.01% | 0.01% | 0.01% |
| *Prosthecobacter* | >0.01% | >0.01% | >0.01% | 0.01% |
| *Geobacillus* | >0.01% | >0.01% | 0.01% | >0.01% |
| *Belnapia* | >0.01% | >0.01% | >0.01% | 0.01% |
| *Filomicrobium* | >0.01% | >0.01% | 0.01% | >0.01% |
| *Sphaerisporangium* | >0.01% | >0.01% | >0.01% | 0.01% |
| *Uncultured Holophagasp.* | >0.01% | >0.01% | >0.01% | >0.01% |
| *Ochrobactrum* | 0.01% | >0.01% | >0.01% | >0.01% |
| *Promicromonospora* | 0.01% | >0.01% | >0.01% | 0.01% |
| *Anaerobacillus* | >0.01% | 0.01% | >0.01% | >0.01% |
| *Rhodobacter* | 0.01% | >0.01% | >0.01% | >0.01% |
| *Bordetella* | >0.01% | >0.01% | >0.01% | >0.01% |
| *Thermomonas* | 0.01% | 0.01% | >0.01% | >0.01% |
| *Limnohabitans* | >0.01% | >0.01% | >0.01% | 0.01% |
| *Escherichia-Shigella* | >0.01% | >0.01% | >0.01% | 0.01% |
| *Illumatobacter* | 0.01% | >0.01% | >0.01% | >0.01% |
| *Ureibacillus* | >0.01% | >0.01% | >0.01% | >0.01% |
| *Ruminiclostridium* | >0.01% | >0.01% | >0.01% | >0.01% |
| *Thermoactinomyces* | >0.01% | >0.01% | >0.01% | >0.01% |
| *Gordonia* | 0.01% | >0.01% | >0.01% | >0.01% |
| *bacteriumWX65* | >0.01% | >0.01% | >0.01% | 0.01% |
| *Simplicispira* | 0.01% | >0.01% | >0.01% | >0.01% |
| *Parvibaculum* | >0.01% | >0.01% | >0.01% | >0.01% |
| *bacteriumenrichmentculturecloneheteroB56_4W* | >0.01% | >0.01% | >0.01% | >0.01% |
| *Chelatococcussp.P-117* | >0.01% | >0.01% | 0.01% | >0.01% |
| *Planifilum* | >0.01% | >0.01% | >0.01% | >0.01% |
| *Oligoflexus* | >0.01% | >0.01% | >0.01% | >0.01% |
| *Thermoflavimicrobium* | >0.01% | >0.01% | >0.01% | >0.01% |
| *CandidatusOdyssella* | >0.01% | >0.01% | >0.01% | >0.01% |
| *Dyadobacter* | 0.01% | >0.01% | >0.01% | >0.01% |
| *Phycicola* | >0.01% | >0.01% | >0.01% | >0.01% |
| *Panacagrimonas* | >0.01% | >0.01% | >0.01% | >0.01% |
| *Flavihumibacter* | >0.01% | >0.01% | >0.01% | >0.01% |
| *Kocuria* | >0.01% | >0.01% | >0.01% | >0.01% |
| *Cryptosporangium* | >0.01% | 0.01% | >0.01% | >0.01% |
| *Uncultured Rhodospirillalesbacterium* | >0.01% | >0.01% | >0.01% | >0.01% |
| *Kibdelosporangium* | >0.01% | >0.01% | >0.01% | 0.01% |
| *Terrisporobacter* | >0.01% | >0.01% | >0.01% | >0.01% |
| *Kaistia* | >0.01% | >0.01% | >0.01% | >0.01% |
| *Symbiobacterium* | >0.01% | >0.01% | >0.01% | >0.01% |
| *Uncultured Beijerinckiasp.* | >0.01% | >0.01% | >0.01% | >0.01% |
| *Hydrotalea* | >0.01% | >0.01% | >0.01% | >0.01% |
| *Clostridiumsensustricto8* | >0.01% | >0.01% | >0.01% | >0.01% |
| *Uncultured Iamiasp.* | >0.01% | >0.01% | >0.01% | 0.01% |
| *Acetivibrio* | >0.01% | >0.01% | >0.01% | >0.01% |
| *Saccharopolyspora* | >0.01% | >0.01% | >0.01% | >0.01% |
| *Uncultured gammaproteobacterium* | >0.01% | >0.01% | >0.01% | >0.01% |
| *Gracilibacter* | >0.01% | >0.01% | >0.01% | >0.01% |
| *Nostocsp.KK-01* | >0.01% | >0.01% | >0.01% | >0.01% |
| *Fluviicola* | >0.01% | >0.01% | >0.01% | >0.01% |
| *Sediminibacterium* | >0.01% | >0.01% | >0.01% | >0.01% |
| *Allocatelliglobosispora* | >0.01% | >0.01% | >0.01% | >0.01% |
| *Denitratisoma* | >0.01% | >0.01% | >0.01% | >0.01% |
| *Methylosinus* | >0.01% | >0.01% | >0.01% | >0.01% |
| *Nannocystis* | >0.01% | >0.01% | >0.01% | >0.01% |
| *Uncultured Acidobacteriaceaebacterium* | >0.01% | >0.01% | >0.01% | >0.01% |
| *Clostridiumsensustricto11* | >0.01% | >0.01% | >0.01% | >0.01% |
| *Lutispora* | >0.01% | >0.01% | >0.01% | >0.01% |
| *CandidatusEntotheonella* | >0.01% | >0.01% | >0.01% | >0.01% |
| *Brevibacillus* | >0.01% | >0.01% | >0.01% | >0.01% |
| *Acidisoma* | >0.01% | >0.01% | >0.01% | >0.01% |
| *Uncultured Phyllobacteriaceaebacterium* | 0.01% | >0.01% | >0.01% | >0.01% |
| *Capsicumannuum* | >0.01% | >0.01% | >0.01% | >0.01% |
| *Williamsia* | >0.01% | >0.01% | >0.01% | >0.01% |
| *Nitrosococcus* | >0.01% | >0.01% | >0.01% | >0.01% |
| *Alkanibacter* | >0.01% | >0.01% | >0.01% | >0.01% |
| *CandidatusSoleaferrea* | >0.01% | >0.01% | >0.01% | >0.01% |
| *Clostridiumsensustricto5* | >0.01% | >0.01% | >0.01% | >0.01% |
| *Ruminococcus1* | >0.01% | >0.01% | >0.01% | >0.01% |
| *Uncultured Caulobacteraceaebacterium* | >0.01% | >0.01% | >0.01% | >0.01% |
| *Fonticella* | >0.01% | >0.01% | >0.01% | >0.01% |
| *Curtobacterium* | >0.01% | >0.01% | >0.01% | >0.01% |
| *Glycomyces* | >0.01% | >0.01% | >0.01% | >0.01% |
| *Geothrix* | >0.01% | >0.01% | >0.01% | >0.01% |
| *Zavarzinella* | >0.01% | >0.01% | >0.01% | >0.01% |
| *Desulfitobacterium* | >0.01% | >0.01% | >0.01% | >0.01% |
| *Uncultured prokaryote* | >0.01% | >0.01% | >0.01% | >0.01% |
| *Ewingella* | >0.01% | >0.01% | >0.01% | >0.01% |
| *bacteriumenrichmentculturecloneheteroC45_4W* | >0.01% | >0.01% | >0.01% | >0.01% |
| *Actinopolymorpha* | >0.01% | >0.01% | >0.01% | >0.01% |
| *Aeribacillus* | >0.01% | >0.01% | >0.01% | >0.01% |
| *Rickettsiellasp.5-186-2* | >0.01% | >0.01% | >0.01% | >0.01% |
| *Neorhizobium* | >0.01% | >0.01% | >0.01% | >0.01% |
| *Spirochaeta2* | >0.01% | >0.01% | >0.01% | >0.01% |
| *Clostridiisalibacter* | >0.01% | >0.01% | >0.01% | >0.01% |
| *Solitalea* | >0.01% | >0.01% | >0.01% | >0.01% |
| *Rubrobacter* | >0.01% | >0.01% | >0.01% | >0.01% |
| *Alkaliphilus* | >0.01% | >0.01% | >0.01% | >0.01% |
| *Actinokineospora* | >0.01% | >0.01% | >0.01% | >0.01% |
| *Uncultured Nitrospiralesbacterium* | 0.01% | >0.01% | >0.01% | >0.01% |
| *Asteroleplasma* | >0.01% | >0.01% | >0.01% | >0.01% |
| *Ralstonia* | >0.01% | >0.01% | >0.01% | >0.01% |
| *Lysinimicrobium* | >0.01% | >0.01% | >0.01% | >0.01% |
| *Aquincola* | >0.01% | >0.01% | >0.01% | >0.01% |
| *Aneurinibacillus* | >0.01% | >0.01% | >0.01% | >0.01% |
| *Anaerospora* | >0.01% | >0.01% | >0.01% | >0.01% |
| *I-8* | >0.01% | >0.01% | >0.01% | >0.01% |
| *Aquibacter* | >0.01% | >0.01% | >0.01% | >0.01% |
| *Calidifontibacter* | >0.01% | >0.01% | >0.01% | >0.01% |
| *LachnospiraceaeUCG-008* | >0.01% | >0.01% | >0.01% | >0.01% |
| *Peptoclostridium* | >0.01% | >0.01% | >0.01% | >0.01% |
| *Demequina* | >0.01% | >0.01% | >0.01% | >0.01% |
| *Cronobacter* | >0.01% | >0.01% | >0.01% | >0.01% |
| *Paenisporosarcina* | >0.01% | >0.01% | >0.01% | >0.01% |
| *Herpetosiphon* | >0.01% | >0.01% | >0.01% | >0.01% |
| *Caldicoprobacter* | >0.01% | >0.01% | >0.01% | >0.01% |
| *Ideonella* | >0.01% | >0.01% | >0.01% | >0.01% |
| *Pelotomaculum* | >0.01% | >0.01% | >0.01% | >0.01% |
| *Coxiella* | >0.01% | >0.01% | >0.01% | >0.01% |
| *Beijerinckiasp.Lor46* | >0.01% | >0.01% | >0.01% | >0.01% |
| *Sporocytophaga* | >0.01% | >0.01% | >0.01% | >0.01% |
| *Syntrophomonas* | >0.01% | >0.01% | >0.01% | >0.01% |
| *Uncultured Desulfuromonadalesbacterium* | >0.01% | >0.01% | >0.01% | >0.01% |
| *Uncultured bacteriumAk20-3* | >0.01% | >0.01% | >0.01% | >0.01% |
| *Salinibacteriumsp.BA-73-09* | >0.01% | >0.01% | >0.01% | >0.01% |
| *Barrientosiimonas* | >0.01% | >0.01% | >0.01% | >0.01% |
| *Sedimentibacter* | >0.01% | >0.01% | >0.01% | >0.01% |
| *Actinocatenispora* | >0.01% | >0.01% | >0.01% | >0.01% |
| *Terriglobus* | >0.01% | >0.01% | >0.01% | >0.01% |
| *Nitrobacter* | >0.01% | >0.01% | >0.01% | >0.01% |
| *PythiumiwayamaiDAOMBR242034* | >0.01% | >0.01% | >0.01% | >0.01% |
| *Asanoa* | >0.01% | >0.01% | >0.01% | >0.01% |
| *Uncultured Solirubrobactersp.* | >0.01% | >0.01% | >0.01% | >0.01% |
| *unidentified* | >0.01% | >0.01% | >0.01% | >0.01% |
| *Amnibacterium* | >0.01% | >0.01% | >0.01% | >0.01% |
| *Gemmobacter* | >0.01% | >0.01% | >0.01% | >0.01% |
| *Tyzzerella3* | >0.01% | >0.01% | >0.01% | >0.01% |
| *Diaminobutyricimonas* | >0.01% | >0.01% | >0.01% | >0.01% |
| *Thermobispora* | >0.01% | >0.01% | >0.01% | >0.01% |
| *Uncultured Acidimicrobialesbacterium* | >0.01% | >0.01% | >0.01% | >0.01% |
| *Methylocapsa* | >0.01% | >0.01% | >0.01% | >0.01% |
| *Endobacter* | >0.01% | >0.01% | >0.01% | >0.01% |
| *Pseudospirillum* | >0.01% | >0.01% | >0.01% | >0.01% |
| *Kurthia* | >0.01% | >0.01% | >0.01% | >0.01% |
| *Proteiniborus* | >0.01% | >0.01% | >0.01% | >0.01% |
| *Tissierella* | >0.01% | >0.01% | >0.01% | >0.01% |
| *Ruminiclostridium5* | >0.01% | >0.01% | >0.01% | >0.01% |
| *Alterococcus* | >0.01% | >0.01% | >0.01% | >0.01% |
| *Arcticibacter* | >0.01% | >0.01% | >0.01% | >0.01% |
| *Actinophytocola* | >0.01% | >0.01% | >0.01% | >0.01% |
| *Uncultured Verrucomicrobialesbacterium* | >0.01% | >0.01% | >0.01% | >0.01% |
| *Acidocella* | >0.01% | >0.01% | >0.01% | >0.01% |
| *Uncultured Acidobacterialesbacterium* | >0.01% | >0.01% | >0.01% | >0.01% |
| *Thermopolyspora* | >0.01% | >0.01% | >0.01% | >0.01% |
| *Cryocola* | >0.01% | >0.01% | >0.01% | >0.01% |
| *Lautropia* | >0.01% | >0.01% | >0.01% | >0.01% |
| *Aestuariimicrobium* | >0.01% | >0.01% | >0.01% | >0.01% |
| *Turneriella* | >0.01% | >0.01% | >0.01% | >0.01% |
| *Mastigocladopsis* | >0.01% | >0.01% | >0.01% | >0.01% |
| *Criblamydia* | >0.01% | >0.01% | >0.01% | >0.01% |
| *Anaerosporobacter* | >0.01% | >0.01% | >0.01% | >0.01% |
| *Rhizocola* | >0.01% | >0.01% | >0.01% | >0.01% |
| *Rivibacter* | >0.01% | >0.01% | >0.01% | >0.01% |
| *LD28freshwatergroup* | >0.01% | >0.01% | >0.01% | >0.01% |
| *Pseudorhodoferax* | >0.01% | >0.01% | >0.01% | >0.01% |
| *Rhodoferax* | >0.01% | >0.01% | >0.01% | >0.01% |
| *Okibacterium* | >0.01% | >0.01% | >0.01% | >0.01% |
| *Intrasporangium* | >0.01% | >0.01% | >0.01% | >0.01% |
| *Alkalibacter* | >0.01% | >0.01% | >0.01% | >0.01% |
| *Pseudanabaenasp.CAWBG530* | >0.01% | >0.01% | >0.01% | >0.01% |
| *Pseudoxanthomonas* | >0.01% | >0.01% | >0.01% | >0.01% |
| *Uliginosibacterium* | >0.01% | >0.01% | >0.01% | >0.01% |
| *Beutenbergia* | >0.01% | >0.01% | >0.01% | >0.01% |
| *Filimonas* | >0.01% | >0.01% | >0.01% | >0.01% |
| *Cytophaga* | >0.01% | >0.01% | >0.01% | >0.01% |
| *Marisediminicola* | >0.01% | >0.01% | >0.01% | >0.01% |
| *Uncultured Frankiaceaebacterium* | >0.01% | >0.01% | >0.01% | >0.01% |
| *Cellulosilyticum* | >0.01% | >0.01% | >0.01% | >0.01% |
| *RhizobialesbacteriumUme16* | >0.01% | >0.01% | >0.01% | >0.01% |
| *Albidiferax* | >0.01% | >0.01% | >0.01% | >0.01% |
| *Desulfotomaculum* | >0.01% | >0.01% | >0.01% | >0.01% |
| *Desulfitibacter* | >0.01% | >0.01% | >0.01% | >0.01% |
| *Rickettsia* | >0.01% | >0.01% | >0.01% | >0.01% |
| *Magnetospirillum* | >0.01% | >0.01% | >0.01% | >0.01% |
| *Uncultured Chlorobibacterium* | >0.01% | >0.01% | >0.01% | >0.01% |
| *RuminococcaceaeUCG-012* | >0.01% | >0.01% | >0.01% | >0.01% |
| *CL500-3* | >0.01% | >0.01% | >0.01% | >0.01% |
| *Viridibacillus* | >0.01% | >0.01% | >0.01% | >0.01% |
| *Perlucidibaca* | >0.01% | >0.01% | >0.01% | >0.01% |
| *Geminicoccus* | >0.01% | >0.01% | >0.01% | >0.01% |
| *ChlamydialesbacteriumNS11* | >0.01% | >0.01% | >0.01% | >0.01% |
| *Parasegetibacter* | >0.01% | >0.01% | >0.01% | >0.01% |
| *Uncultured Geobacteraceaebacterium* | >0.01% | >0.01% | >0.01% | >0.01% |
| *Leucobacter* | >0.01% | >0.01% | >0.01% | >0.01% |
| *Uncultured Acidobacteriumsp.* | >0.01% | >0.01% | >0.01% | >0.01% |
| *Chryseoglobus* | >0.01% | >0.01% | >0.01% | >0.01% |
| *Blastopirellula* | >0.01% | >0.01% | >0.01% | >0.01% |
| *Telmatospirillum* | >0.01% | >0.01% | >0.01% | >0.01% |
| *Laceyella* | >0.01% | >0.01% | >0.01% | >0.01% |
| *Brachymonas* | >0.01% | >0.01% | >0.01% | >0.01% |
| *Uncultured Acidimicrobiaceaebacterium* | >0.01% | >0.01% | >0.01% | >0.01% |
| *Zymomonas* | >0.01% | >0.01% | >0.01% | >0.01% |
| *Clostridiumsensustricto10* | >0.01% | >0.01% | >0.01% | >0.01% |
| *Rickettsiella* | >0.01% | >0.01% | >0.01% | >0.01% |
| *Plantactinospora* | >0.01% | >0.01% | >0.01% | >0.01% |
| *Micropruina* | >0.01% | >0.01% | >0.01% | >0.01% |
| *Propionibacterium* | >0.01% | >0.01% | >0.01% | >0.01% |
| *ChlamydialesbacteriumCRIB32* | >0.01% | >0.01% | >0.01% | >0.01% |
| *Anaerobacterium* | >0.01% | >0.01% | >0.01% | >0.01% |
| *Oerskovia* | >0.01% | >0.01% | >0.01% | >0.01% |
| *Uncultured thermalsoilbacterium* | >0.01% | >0.01% | >0.01% | >0.01% |
| *Thiobacillus* | >0.01% | >0.01% | >0.01% | >0.01% |
| *Aeromonas* | >0.01% | >0.01% | >0.01% | >0.01% |
| *Saccharomonospora* | >0.01% | >0.01% | >0.01% | >0.01% |
| *Halocella* | >0.01% | >0.01% | >0.01% | >0.01% |
| *Methylibium* | >0.01% | >0.01% | >0.01% | >0.01% |
| *Rubrivivax* | >0.01% | >0.01% | >0.01% | >0.01% |
| *ChristensenellaceaeR-7group* | >0.01% | >0.01% | >0.01% | >0.01% |
| *Sinomonas* | >0.01% | >0.01% | >0.01% | >0.01% |
| *bacteriumenrichmentculturecloneauto222_4W* | >0.01% | >0.01% | >0.01% | >0.01% |
| *Clostridiumsensustricto7* | >0.01% | >0.01% | >0.01% | >0.01% |
| *Ammoniibacillus* | >0.01% | >0.01% | >0.01% | >0.01% |
| *Uncultured sludgebacteriumA12b* | >0.01% | >0.01% | >0.01% | >0.01% |
| *Acidiferrobacter* | >0.01% | >0.01% | >0.01% | >0.01% |
| *LachnospiraceaeUCG-007* | >0.01% | >0.01% | >0.01% | >0.01% |
| *Clostridiumsensustricto2* | >0.01% | >0.01% | >0.01% | >0.01% |
| *Aquamicrobium* | >0.01% | >0.01% | >0.01% | >0.01% |
| *Plantibacter* | >0.01% | >0.01% | >0.01% | >0.01% |
| *Verrucomicrobium* | >0.01% | >0.01% | >0.01% | >0.01% |
| *CandidatusGlomeribacter* | >0.01% | >0.01% | >0.01% | >0.01% |
| *Dehalobacter* | >0.01% | >0.01% | >0.01% | >0.01% |
| *Acidicapsa* | >0.01% | >0.01% | >0.01% | >0.01% |
| *Tetraphispellucida* | >0.01% | >0.01% | >0.01% | >0.01% |
| *Quadrisphaera* | >0.01% | >0.01% | >0.01% | >0.01% |
| *Arsenicicoccus* | >0.01% | >0.01% | >0.01% | >0.01% |
| *Tyzzerella* | >0.01% | >0.01% | >0.01% | >0.01% |
| *Papillibacter* | >0.01% | >0.01% | >0.01% | >0.01% |
| *FamilyXIIIUCG-002* | >0.01% | >0.01% | >0.01% | >0.01% |
| *Caldibacillus* | >0.01% | >0.01% | >0.01% | >0.01% |
| *Anaerostipes* | >0.01% | >0.01% | >0.01% | >0.01% |
| *Dermacoccus* | >0.01% | >0.01% | >0.01% | >0.01% |
| *Advenella* | >0.01% | >0.01% | >0.01% | >0.01% |
| *Gemella* | >0.01% | >0.01% | >0.01% | >0.01% |
| *Bryocella* | >0.01% | >0.01% | >0.01% | >0.01% |
| *Polyangium* | >0.01% | >0.01% | >0.01% | >0.01% |
| *PseudanabaenaminimaCHAB705* | >0.01% | >0.01% | >0.01% | >0.01% |
| *Alkanindiges* | >0.01% | >0.01% | >0.01% | >0.01% |
| *Thioclava* | >0.01% | >0.01% | >0.01% | >0.01% |
| *Sphingosinicellasp.YJ22* | >0.01% | >0.01% | >0.01% | >0.01% |
| *Agaricicola* | >0.01% | >0.01% | >0.01% | >0.01% |
| *Aliihoeflea* | >0.01% | >0.01% | >0.01% | >0.01% |
| *Cyanobacterium* | >0.01% | >0.01% | >0.01% | >0.01% |
| *Micrococcus* | >0.01% | >0.01% | >0.01% | >0.01% |
| *OM60(NOR5)clade* | >0.01% | >0.01% | >0.01% | >0.01% |
| *Romboutsia* | >0.01% | >0.01% | >0.01% | >0.01% |
| *Roseococcus* | >0.01% | >0.01% | >0.01% | >0.01% |
| *Citrobacter* | >0.01% | >0.01% | >0.01% | >0.01% |
| *Branchiibius* | >0.01% | >0.01% | >0.01% | >0.01% |
| *Spirosoma* | >0.01% | >0.01% | >0.01% | >0.01% |
| *AcidobacteriabacteriumLX3* | >0.01% | >0.01% | >0.01% | >0.01% |
| *Kytococcus* | >0.01% | >0.01% | >0.01% | >0.01% |
| *Phormidium* | >0.01% | >0.01% | >0.01% | >0.01% |
| *Rubellimicrobium* | >0.01% | >0.01% | >0.01% | >0.01% |
| *IncertaeSedis* | >0.01% | >0.01% | >0.01% | >0.01% |
| *Prosthecomicrobium* | >0.01% | >0.01% | >0.01% | >0.01% |
| *Sarcina* | >0.01% | >0.01% | >0.01% | >0.01% |
| *Uncultured Sporomusasp.* | >0.01% | >0.01% | >0.01% | >0.01% |
| *Dendrosporobacter* | >0.01% | >0.01% | >0.01% | >0.01% |
| *Alkalibaculum* | >0.01% | >0.01% | >0.01% | >0.01% |
| *Brachybacterium* | >0.01% | >0.01% | >0.01% | >0.01% |
| *Halolactibacillus* | >0.01% | >0.01% | >0.01% | >0.01% |
| *Uncultured marinebacterium* | >0.01% | >0.01% | >0.01% | >0.01% |
| *Collimonas* | >0.01% | >0.01% | >0.01% | >0.01% |
| *Caldalkalibacillus* | >0.01% | >0.01% | >0.01% | >0.01% |
| *Uncultured Stigmatellasp.* | >0.01% | >0.01% | >0.01% | >0.01% |
| *actinobacteriumYJF2-33* | >0.01% | >0.01% | >0.01% | >0.01% |
| *Cellulosibacter* | >0.01% | >0.01% | >0.01% | >0.01% |
| *LachnospiraceaeUCG-005* | >0.01% | >0.01% | >0.01% | >0.01% |
| *Pantoea* | >0.01% | >0.01% | >0.01% | >0.01% |
| *CandidatusAccumulibacter* | >0.01% | >0.01% | >0.01% | >0.01% |
| *Marinicella* | >0.01% | >0.01% | >0.01% | >0.01% |
| *Prauserella* | >0.01% | >0.01% | >0.01% | >0.01% |
| *Acrocarpaspora* | >0.01% | >0.01% | >0.01% | >0.01% |
| *Rhodovulum* | >0.01% | >0.01% | >0.01% | >0.01% |
| *Sporacetigenium* | >0.01% | >0.01% | >0.01% | >0.01% |
| *Uncultured Nitrosomonadalesbacterium* | >0.01% | >0.01% | >0.01% | >0.01% |
| *Salimesophilobacter* | >0.01% | >0.01% | >0.01% | >0.01% |
| *Oxalophagus* | >0.01% | >0.01% | >0.01% | >0.01% |
| *Rugosimonospora* | >0.01% | >0.01% | >0.01% | >0.01% |
| *CandidatusCaedibacteracanthamoebae* | >0.01% | >0.01% | >0.01% | >0.01% |
| *Neochlamydia* | >0.01% | >0.01% | >0.01% | >0.01% |
| *Litorilinea* | >0.01% | >0.01% | >0.01% | >0.01% |
| *Ornithinicoccus* | >0.01% | >0.01% | >0.01% | >0.01% |
| *RuminococcaceaeNK4A214group* | >0.01% | >0.01% | >0.01% | >0.01% |
| *Lachnoclostridium12* | >0.01% | >0.01% | >0.01% | >0.01% |
| *Acetanaerobacterium* | >0.01% | >0.01% | >0.01% | >0.01% |
| *Meganema* | >0.01% | >0.01% | >0.01% | >0.01% |
| *Sideroxydans* | >0.01% | >0.01% | >0.01% | >0.01% |
| *Sporanaerobacter* | >0.01% | >0.01% | >0.01% | >0.01% |
| *LachnospiraceaeUCG-009* | >0.01% | >0.01% | >0.01% | >0.01% |
| *Leptospira* | >0.01% | >0.01% | >0.01% | >0.01% |
| *Pseudobacteroides* | >0.01% | >0.01% | >0.01% | >0.01% |
| *Uncultured Ammoniphilussp.* | >0.01% | >0.01% | >0.01% | >0.01% |
| *Cerasibacillus* | >0.01% | >0.01% | >0.01% | >0.01% |
| *Catelliglobosispora* | >0.01% | >0.01% | >0.01% | >0.01% |
| *Fulvimarina* | >0.01% | >0.01% | >0.01% | >0.01% |
| *Pseudenhygromyxa* | >0.01% | >0.01% | >0.01% | >0.01% |
| *Bartonella* | >0.01% | >0.01% | >0.01% | >0.01% |
| *Cellulosimicrobium* | >0.01% | >0.01% | >0.01% | >0.01% |
| *Anaerosalibacter* | >0.01% | >0.01% | >0.01% | >0.01% |
| *Ferritrophicum* | >0.01% | >0.01% | >0.01% | >0.01% |
| *Staphylococcus* | >0.01% | >0.01% | >0.01% | >0.01% |
| *Thermaerobacter* | >0.01% | >0.01% | >0.01% | >0.01% |
| *Vogesella* | >0.01% | >0.01% | >0.01% | >0.01% |
| *CandidatusRhabdochlamydia* | >0.01% | >0.01% | >0.01% | >0.01% |
| *Listeria* | >0.01% | >0.01% | >0.01% | >0.01% |
| *Paracocccus* | >0.01% | >0.01% | >0.01% | >0.01% |
| *Piscinibacter* | >0.01% | >0.01% | >0.01% | >0.01% |
| *RuminococcaceaeUCG-010* | >0.01% | >0.01% | >0.01% | >0.01% |
| *bacteriumEllin6089* | >0.01% | >0.01% | >0.01% | >0.01% |
| *Corynebacterium1* | >0.01% | >0.01% | >0.01% | >0.01% |
| *Haloplasma* | >0.01% | >0.01% | >0.01% | >0.01% |
| *Sporotomaculum* | >0.01% | >0.01% | >0.01% | >0.01% |
| *Triticumaestivum(breadwheat)* | >0.01% | >0.01% | >0.01% | >0.01% |
| *Truepera* | >0.01% | >0.01% | >0.01% | >0.01% |
| *Uncultured eubacteriumWD260* | >0.01% | >0.01% | >0.01% | >0.01% |
| *Epilithonimonas* | >0.01% | >0.01% | >0.01% | >0.01% |
| *Mycetocola* | >0.01% | >0.01% | >0.01% | >0.01% |
| *Ottowia* | >0.01% | >0.01% | >0.01% | >0.01% |
| *Cryptanaerobacter* | >0.01% | >0.01% | >0.01% | >0.01% |
| *Larkinella* | >0.01% | >0.01% | >0.01% | >0.01% |
| *RuminococcaceaeUCG-014* | >0.01% | >0.01% | >0.01% | >0.01% |
| *Xylophilus* | >0.01% | >0.01% | >0.01% | >0.01% |
| *Azonexus* | >0.01% | >0.01% | >0.01% | >0.01% |
| *Armatimonas* | >0.01% | >0.01% | >0.01% | >0.01% |
| *Defluviitalea* | >0.01% | >0.01% | >0.01% | >0.01% |
| *Halomonas* | >0.01% | >0.01% | >0.01% | >0.01% |
| *Hydrogenophaga* | >0.01% | >0.01% | >0.01% | >0.01% |
| *Methylophilus* | >0.01% | >0.01% | >0.01% | >0.01% |
| *Sanguibacter* | >0.01% | >0.01% | >0.01% | >0.01% |
| *Tepidimicrobium* | >0.01% | >0.01% | >0.01% | >0.01% |
| *Tetrasphaera* | >0.01% | >0.01% | >0.01% | >0.01% |
| *Chitinivorax* | >0.01% | >0.01% | >0.01% | >0.01% |
| *Lachnoclostridium10* | >0.01% | >0.01% | >0.01% | >0.01% |
| *Propionivibrio* | >0.01% | >0.01% | >0.01% | >0.01% |
| *Syntrophaceticus* | >0.01% | >0.01% | >0.01% | >0.01% |
| *Chelatococcus* | >0.01% | >0.01% | >0.01% | >0.01% |
| *Kroppenstedtia* | >0.01% | >0.01% | >0.01% | >0.01% |
| *Pontibacter* | >0.01% | >0.01% | >0.01% | >0.01% |
| *Uncultured cyanobacterium* | >0.01% | >0.01% | >0.01% | >0.01% |
|  |  |  |  |  |
